# Supplementary material
Source: PubMed Central journal article supplement (PMC3419848)
Supplement: Supp_Data.pdf [file Supp_Data.pdf]

## Supplementary Data

**Supplementary Table 1**

This table shows the inflammatory gene set as defined by the Gene Ontology (GO) project ([www.geneontology.org](http://www.geneontology.org)). N refers to the number of genes in the pathway

| <i>GO - Pathway Name</i>                             | <i>N[genes]</i> | <i>N[genes in data]</i> | <i>%</i>   |
|------------------------------------------------------|-----------------|-------------------------|------------|
| Activation of immune response                        | 17              | 12                      | 70.6       |
| Acute inflammatory response                          | 11              | 5                       | 45.5       |
| Adaptive immune response                             | 25              | 14                      | 56.0       |
| Adaptive immune response go 0002460                  | 24              | 13                      | 54.2       |
| Antigen binding                                      | 28              | 15                      | 53.6       |
| B cell activation                                    | 19              | 13                      | 68.4       |
| Chemokine activity                                   | 42              | 15                      | 35.7       |
| Cytokine activity                                    | 111             | 38                      | 34.2       |
| Cytokine and chemokine mediated signaling pathway    | 23              | 13                      | 56.5       |
| Cytokine binding                                     | 46              | 33                      | 71.7       |
| Cytokine biosynthetic process                        | 40              | 24                      | 60.0       |
| Cytokine metabolic process                           | 41              | 25                      | 61.0       |
| Cytokine production                                  | 72              | 46                      | 63.9       |
| Cytokine secretion                                   | 18              | 10                      | 55.6       |
| Cytokinesis                                          | 19              | 8                       | 42.1       |
| Humoral immune response                              | 31              | 17                      | 54.8       |
| Immune effector process                              | 38              | 22                      | 57.9       |
| Immune response                                      | 232             | 149                     | 64.2       |
| Immune system development                            | 80              | 52                      | 65.0       |
| Immune system process                                | 326             | 218                     | 66.9       |
| Immunological synapse                                | 11              | 9                       | 81.8       |
| Inflammatory response                                | 124             | 81                      | 65.3       |
| Innate immune response                               | 23              | 8                       | 34.8       |
| Interleukin 1 secretion                              | 10              | 8                       | 80.0       |
| Jak stat cascade                                     | 31              | 23                      | 74.2       |
| Jnk cascade                                          | 47              | 32                      | 68.1       |
| Leukocyte activation                                 | 67              | 42                      | 62.7       |
| Lymphocyte activation                                | 60              | 38                      | 63.3       |
| Negative regulation of cytokine biosynthetic process | 11              | 5                       | 45.5       |
| Negative regulation of immune system process         | 14              | 7                       | 50.0       |
| Nuclear speck                                        | 11              | 7                       | 63.6       |
| Positive regulation of cytokine biosynthetic process | 24              | 16                      | 66.7       |
| Positive regulation of cytokine production           | 15              | 11                      | 73.3       |
| Positive regulation of cytokine secretion            | 10              | 6                       | 60.0       |
| Positive regulation of immune response               | 29              | 16                      | 55.2       |
| Positive regulation of immune system process         | 51              | 31                      | 60.8       |
| Production of molecular mediator of immune response  | 13              | 7                       | 53.8       |
| Regulation of cytokine biosynthetic process          | 37              | 22                      | 59.5       |
| Regulation of cytokine production                    | 25              | 16                      | 64.0       |
| Regulation of cytokine secretion                     | 16              | 8                       | 50.0       |
| Regulation of immune effector process                | 15              | 9                       | 60.0       |
| Regulation of immune response                        | 33              | 16                      | 48.5       |
| Regulation of immune system process                  | 67              | 41                      | 61.2       |
| T cell activation                                    | 44              | 27                      | 61.4       |
|                                                      | 2031            | 1228                    | Mean = 59% |
